# Supplementary material for: Therapeutic potential of 1,3,4-oxadiazoles as potential lead compounds for the treatment of Alzheimer's disease
Source: Royal Society of Chemistry journal article supplement (doi:10.1039/d3ra01953e), 2023-01-01

*Supplementary Material*

**Therapeutic Potential of 1,3,4-oxadiazoles as potential lead compounds for the treatment of Alzheimer's disease**

Saira Naseem<sup>1Ψ</sup>, Ahmed Temirak<sup>2Ψ</sup>, Aqeel Imran<sup>3</sup>, Saquib Jalil<sup>3</sup>, Shamool Fatima<sup>1</sup>, Parham Taslimi<sup>4</sup>, Jamshed Iqbal<sup>3\*</sup>, Mussarat Tasleem<sup>1</sup>, Muhammad Tahir Nawaz<sup>5</sup> and Zahid Shafiq<sup>\*1</sup>

*<sup>1</sup>Institute of Chemical Sciences, Bahauddin Zakariya University, Multan 60800, Pakistan*

*<sup>2</sup>National Research Centre, Chemistry of Natural and Microbial Products Department, Pharmaceutical and Drug Industries Research Institute, Dokki, Cairo P.O. Box 12622, Egypt*

*<sup>3</sup>Centre for Advanced Drug Research, COMSATS University Islamabad, Abbottabad Campus, Abbottabad-22060, Pakistan*

*<sup>4</sup>Department of Biotechnology, Faculty of Science, Bartin University, 74100 Bartin, Turkey*

*<sup>5</sup>Department of Physics, university of Sargodha, Sargodha, Pakistan*

*\*Corresponding Author:*

Prof. Dr. Zahid Shafiq: [zahidshafiq@bzu.edu.pk](mailto:zahidshafiq@bzu.edu.pk)

Prof. Dr. Jamshed Iqbal: [drjamshed@cuiatd.edu.pk](mailto:drjamshed@cuiatd.edu.pk)

Ψ = Authors contributed equally

**Table S1.** Experimental crystal structure details of compound **4n**.

| <b>CCDC</b>                                                                                                    |                                                  |
|----------------------------------------------------------------------------------------------------------------|--------------------------------------------------|
| Chemical formula                                                                                               | C <sub>15</sub> H <sub>13</sub> N <sub>3</sub> O |
| <i>M</i> <sub>r</sub>                                                                                          | 251.28                                           |
| Crystal system, space group                                                                                    | Monoclinic, <i>P</i> 2 <sub>1</sub> / <i>c</i>   |
| Temperature (K)                                                                                                | 296                                              |
| <i>a</i> , <i>b</i> , <i>c</i> (Å)                                                                             | 8.5156 (16), 7.2615 (15), 20.971 (4)             |
| β (°)                                                                                                          | 93.424 (9)                                       |
| <i>V</i> (Å <sup>3</sup> )                                                                                     | 1294.4 (4)                                       |
| <i>Z</i>                                                                                                       | 4                                                |
| Radiation type                                                                                                 | Mo <i>K</i> α                                    |
| μ (mm <sup>-1</sup> )                                                                                          | 0.08                                             |
| Crystal size (mm)                                                                                              | 0.38 × 0.32 × 0.30                               |
| <b>Data collection</b>                                                                                         |                                                  |
| Diffractometer                                                                                                 | Bruker Kappa APEXII CCD                          |
| Absorption correction                                                                                          | Multi-scan ( <i>SADABS</i> ; Bruker, 2005)       |
| No. of measured, independent and observed [ <i>I</i> > 2σ( <i>I</i> )] reflections                             | 11008, 3064, 2374                                |
| <i>R</i> <sub>int</sub>                                                                                        | 0.057                                            |
| (sin θ/λ) <sub>max</sub> (Å <sup>-1</sup> )                                                                    | 0.659                                            |
| <b>Refinement</b>                                                                                              |                                                  |
| <i>R</i> [ <i>F</i> <sup>2</sup> > 2σ( <i>F</i> <sup>2</sup> )], <i>wR</i> ( <i>F</i> <sup>2</sup> ), <i>S</i> | 0.055, 0.160, 1.05                               |
| No. of reflections                                                                                             | 3064                                             |
| No. of parameters                                                                                              | 173                                              |
| H-atom treatment                                                                                               | H-atom parameters constrained                    |
| Δρ <sub>max</sub> , Δρ <sub>min</sub> (e Å <sup>-3</sup> )                                                     | 0.24, -0.23                                      |

**Table S2.** Hydrogen-bond geometry (Å, °) in compound **4n**.

| <i>D</i> —H⋯ <i>A</i> | <i>D</i> —H | H⋯ <i>A</i> | <i>D</i> ⋯ <i>A</i> | <i>D</i> —H⋯ <i>A</i> |
|-----------------------|-------------|-------------|---------------------|-----------------------|
| N1—H1⋯N2 <sup>i</sup> | 0.86        | 2.10        | 2.9373 (19)         | 163                   |

Symmetry code: (i) -*x*+1, -*y*+1, -*z*.

**Table S3.** Computational toxicological evaluation for Compounds **4a-o**.

| <b><u>Code</u></b> | <b><u>Predicted Toxicity class</u></b> | <b><u>Predicted LD50</u></b> | <b><u>Predicted end points of toxicity</u></b>                                  |
|--------------------|----------------------------------------|------------------------------|---------------------------------------------------------------------------------|
| <b>4a</b>          | 4                                      | 550mg/kg                     | Inactive for the Immunotoxicity, mutagenicity and cytotoxicity, carcinogenicity |
| <b>4b</b>          | 4                                      | 800mg/kg                     | Inactive for the Immunotoxicity, mutagenicity and cytotoxicity, carcinogenicity |
| <b>4c</b>          | 4                                      | 800mg/kg                     | Inactive for the Immunotoxicity, mutagenicity and cytotoxicity, carcinogenicity |
| <b>4d</b>          | 4                                      | 580mg/kg                     | Inactive for the Immunotoxicity, mutagenicity and cytotoxicity, carcinogenicity |
| <b>4e</b>          | 4                                      | 550mg/kg                     | Inactive for the Immunotoxicity, mutagenicity and cytotoxicity, carcinogenicity |
| <b>4f</b>          | 4                                      | 550mg/kg                     | Inactive for the Immunotoxicity, mutagenicity and cytotoxicity, carcinogenicity |
| <b>4g</b>          | 4                                      | 550mg/kg                     | Inactive for the Immunotoxicity, mutagenicity and cytotoxicity, carcinogenicity |
| <b>4h</b>          | 4                                      | 550mg/kg                     | Inactive for the Immunotoxicity, mutagenicity and cytotoxicity, carcinogenicity |
| <b>4i</b>          | 4                                      | 1190mg/kg                    | Inactive for the Immunotoxicity, mutagenicity and cytotoxicity, carcinogenicity |
| <b>4j</b>          | 4                                      | 580mg/kg                     | Inactive for the Immunotoxicity, mutagenicity and cytotoxicity, carcinogenicity |
| <b>4k</b>          | 4                                      | 580mg/kg                     | Inactive for the Immunotoxicity, mutagenicity and cytotoxicity, carcinogenicity |
| <b>4l</b>          | 4                                      | 550mg/Kg                     | Inactive for the Immunotoxicity, mutagenicity and cytotoxicity, carcinogenicity |
| <b>4m</b>          | 4                                      | 550mg/Kg                     | Inactive for the Immunotoxicity, mutagenicity and cytotoxicity, carcinogenicity |
| <b>4n</b>          | 4                                      | 550mg/Kg                     | Inactive for the Immunotoxicity, mutagenicity and cytotoxicity, carcinogenicity |
| <b>4o</b>          | 4                                      | 1190mg/kg                    | Inactive for the Immunotoxicity, mutagenicity and cytotoxicity, carcinogenicity |

# H<sup>1</sup> & <sup>13</sup>C NMR of Compound 4a

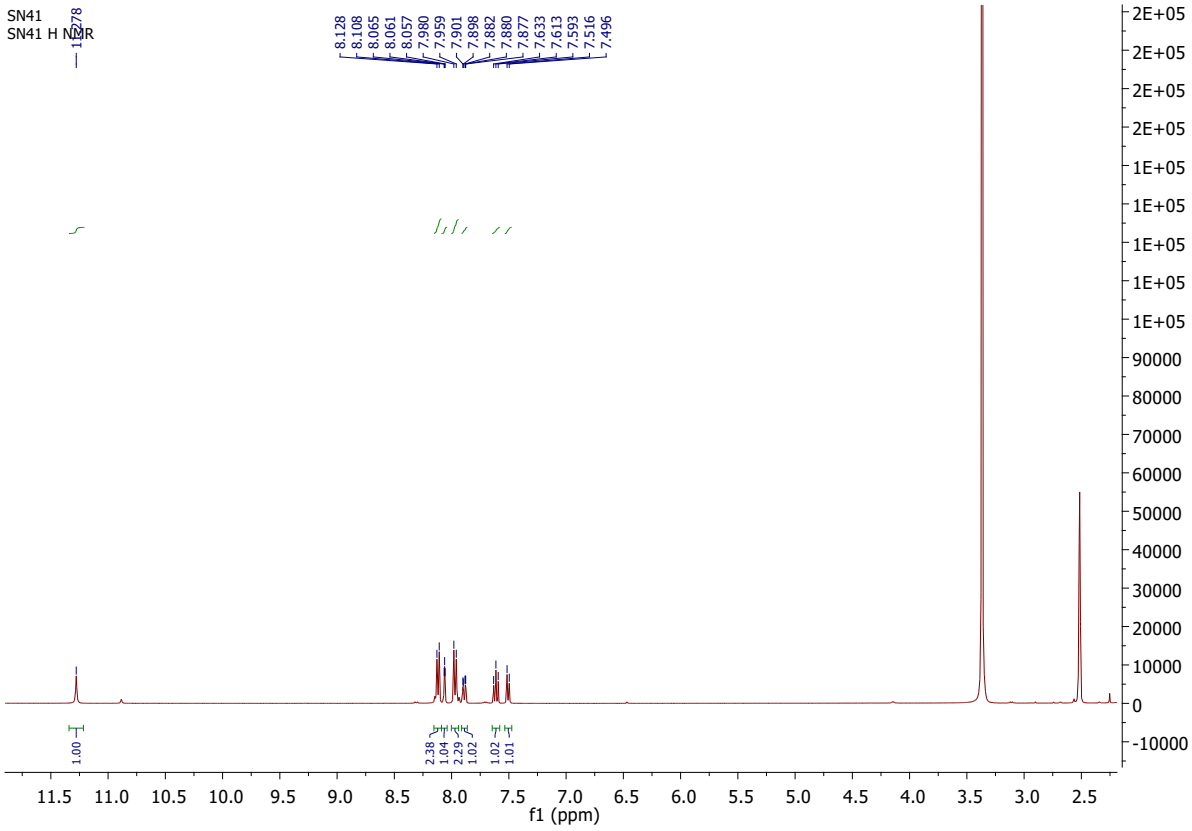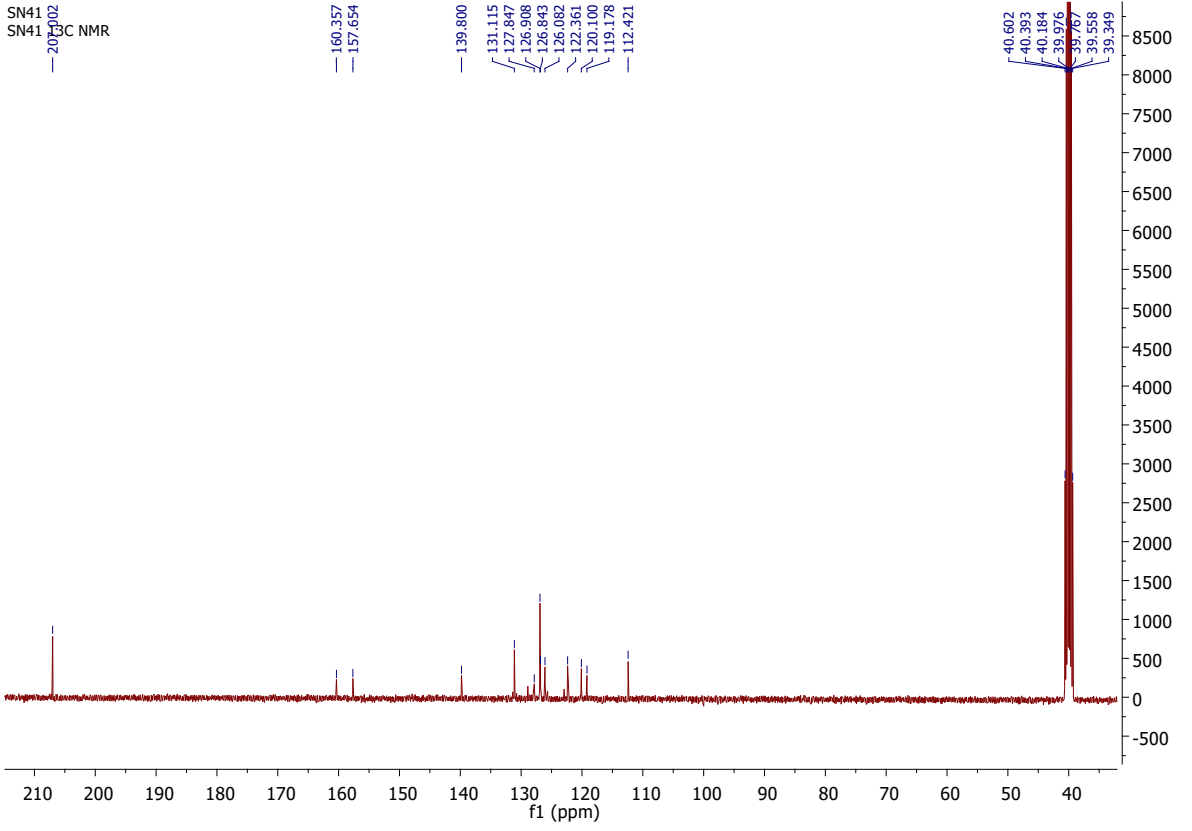

# $^1\text{H}$ & $^{13}\text{C}$ NMR of Compound 4b

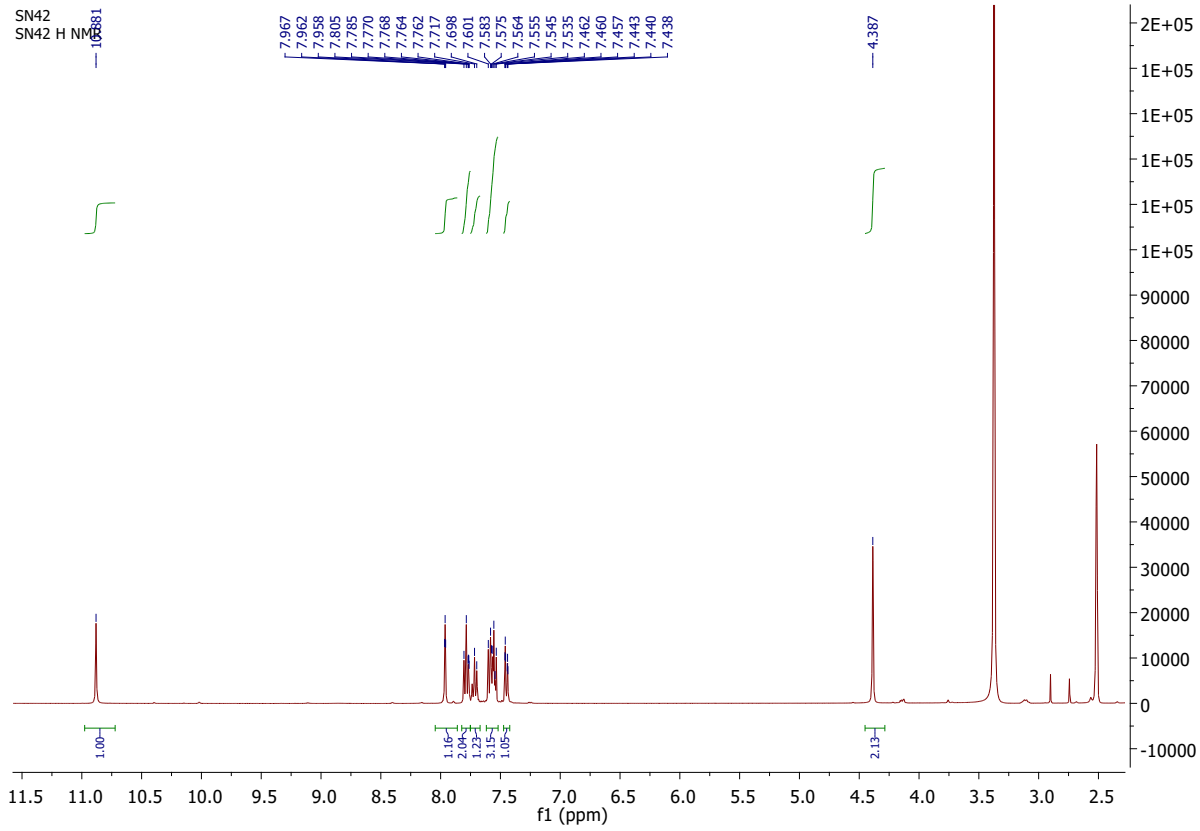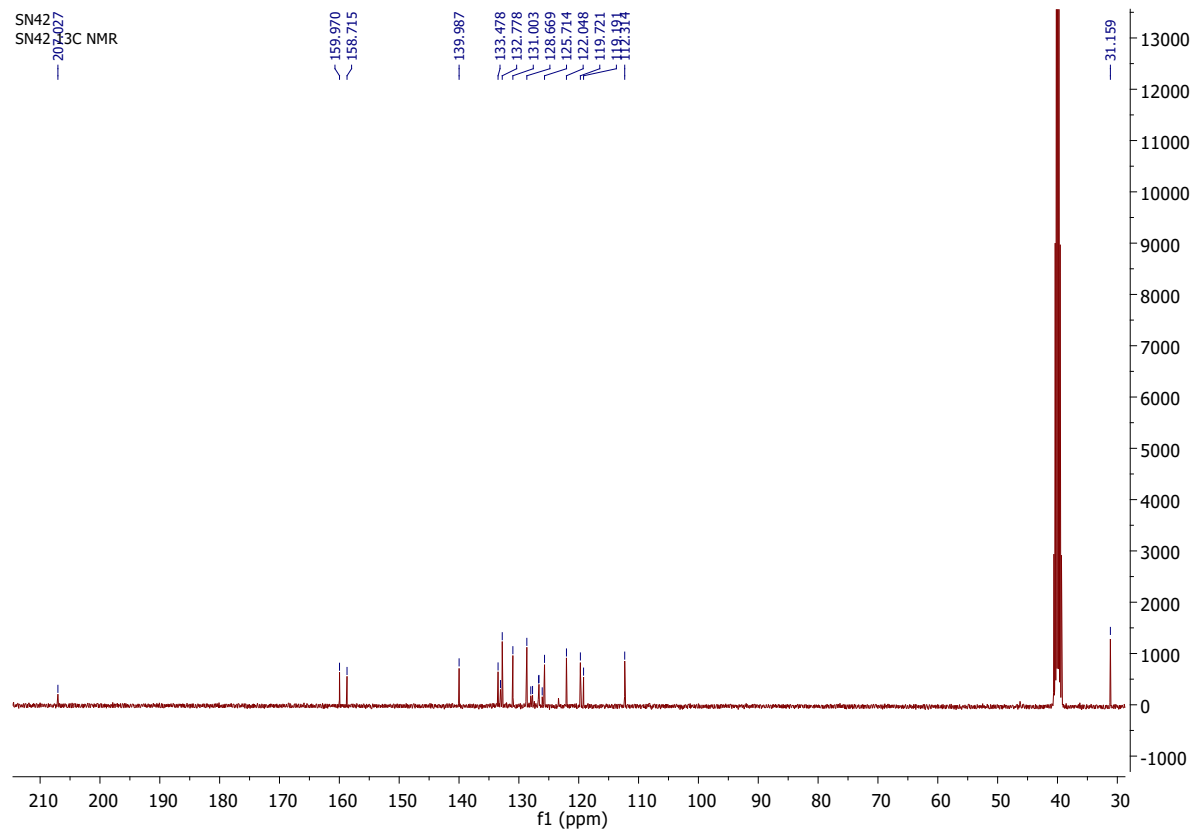

# H<sup>1</sup> & <sup>13</sup>C NMR of Compound 4c

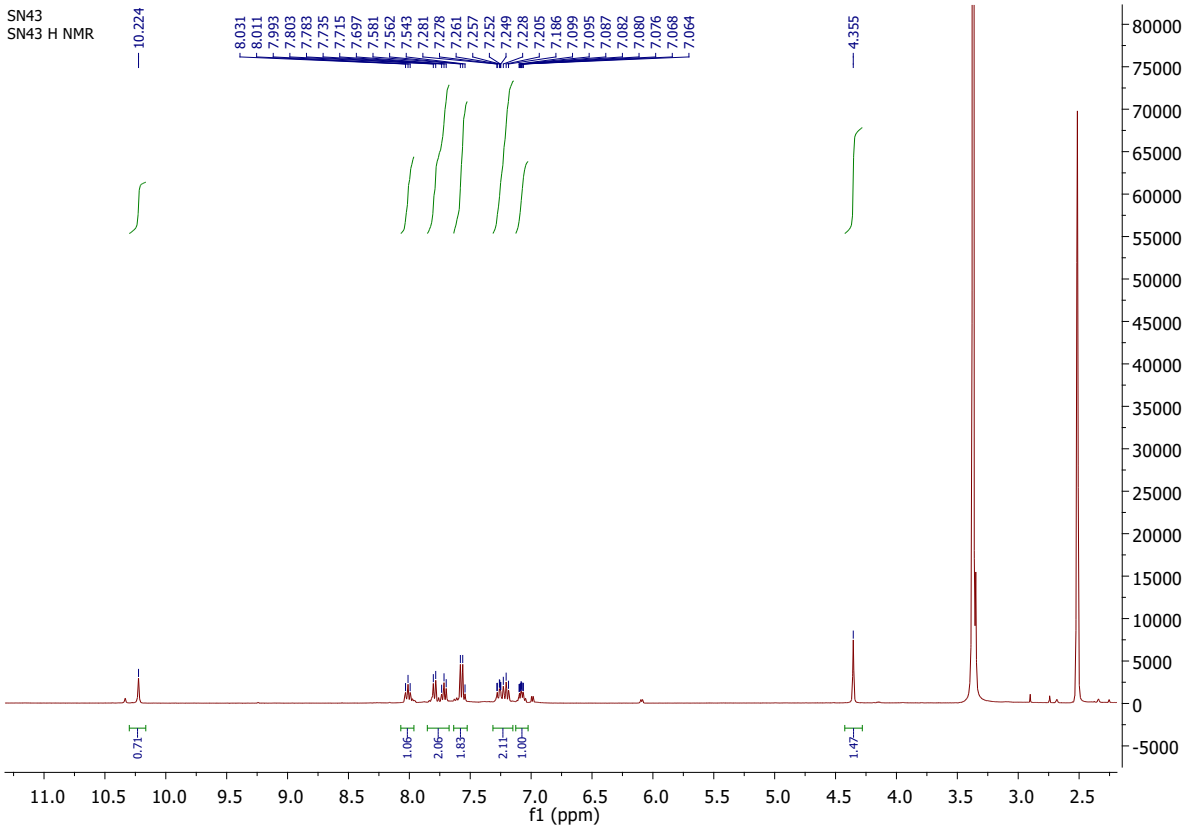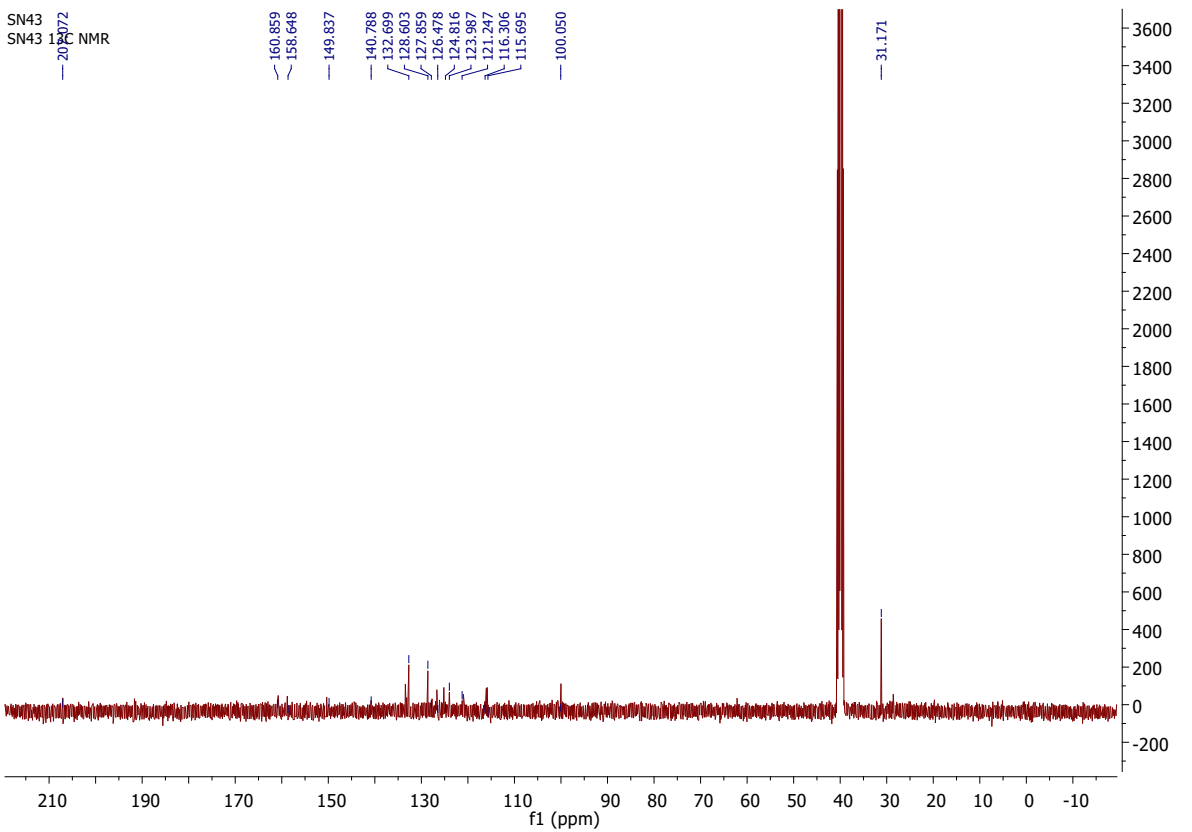

# H<sup>1</sup> & <sup>13</sup>C NMR of Compound 4d

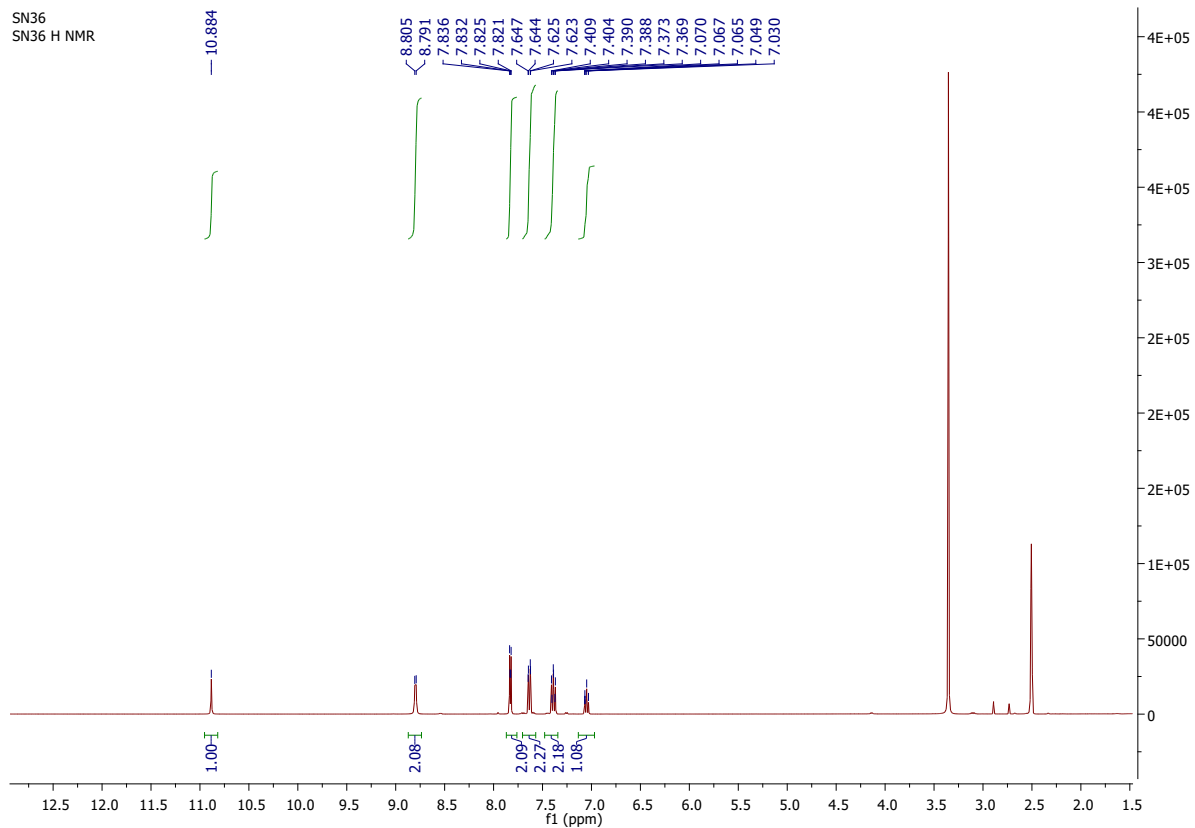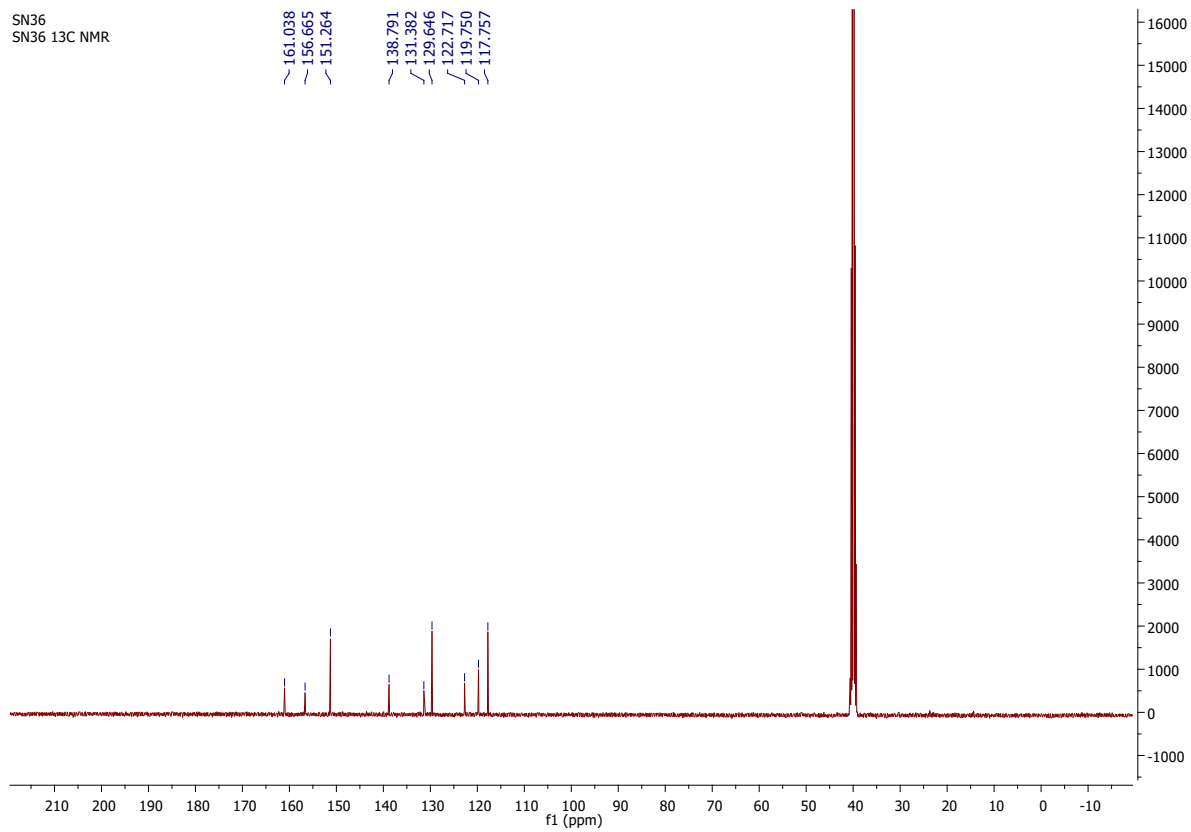

# H<sup>1</sup> & <sup>13</sup>CNMR of Compound 4e

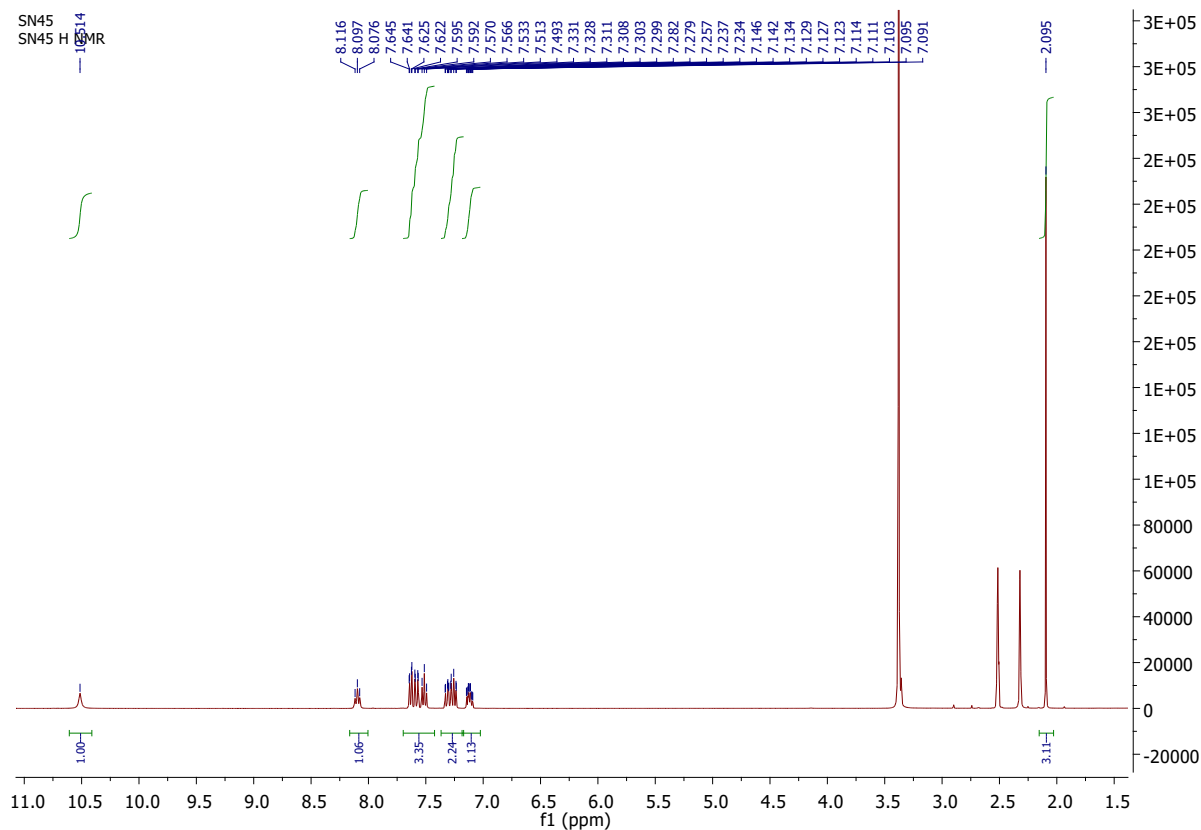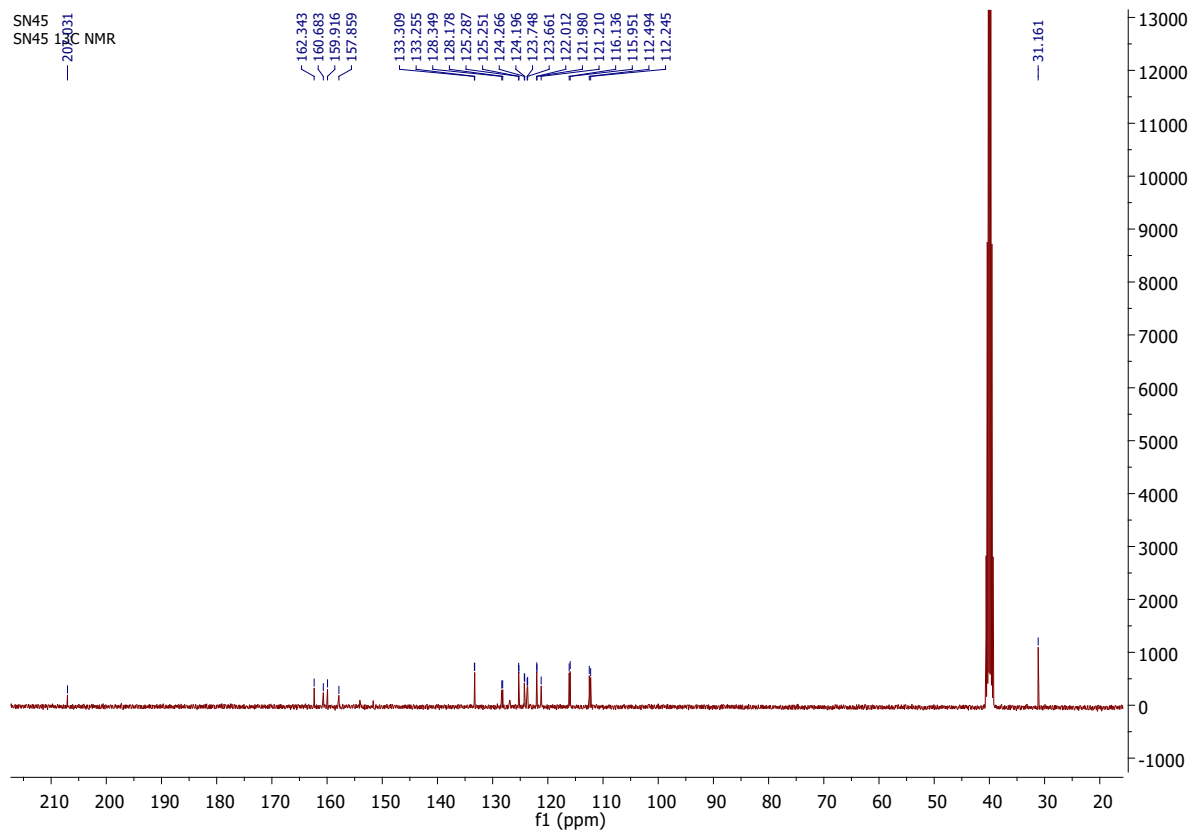

# H<sup>1</sup> & <sup>13</sup>CNMR of Compound 4f



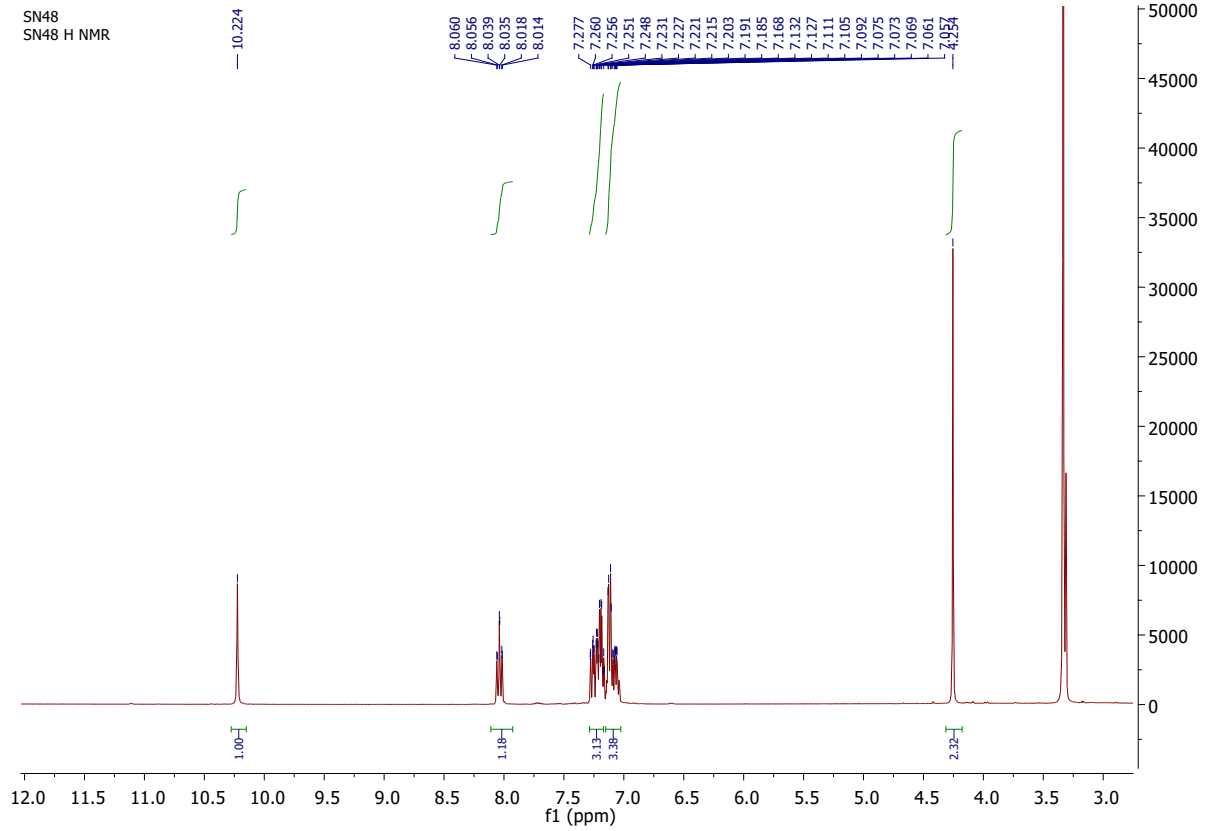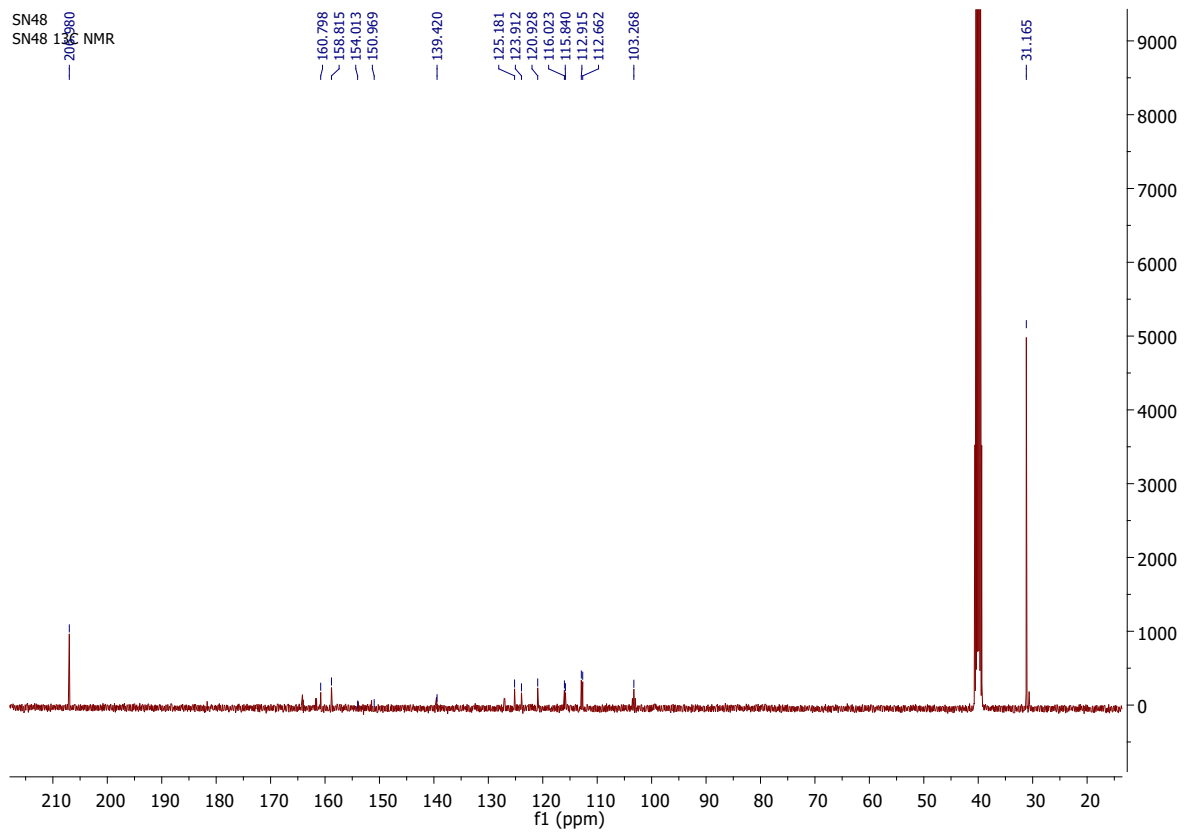

**$H^1$  &  $^{13}C$ NMR of Compound 4g**

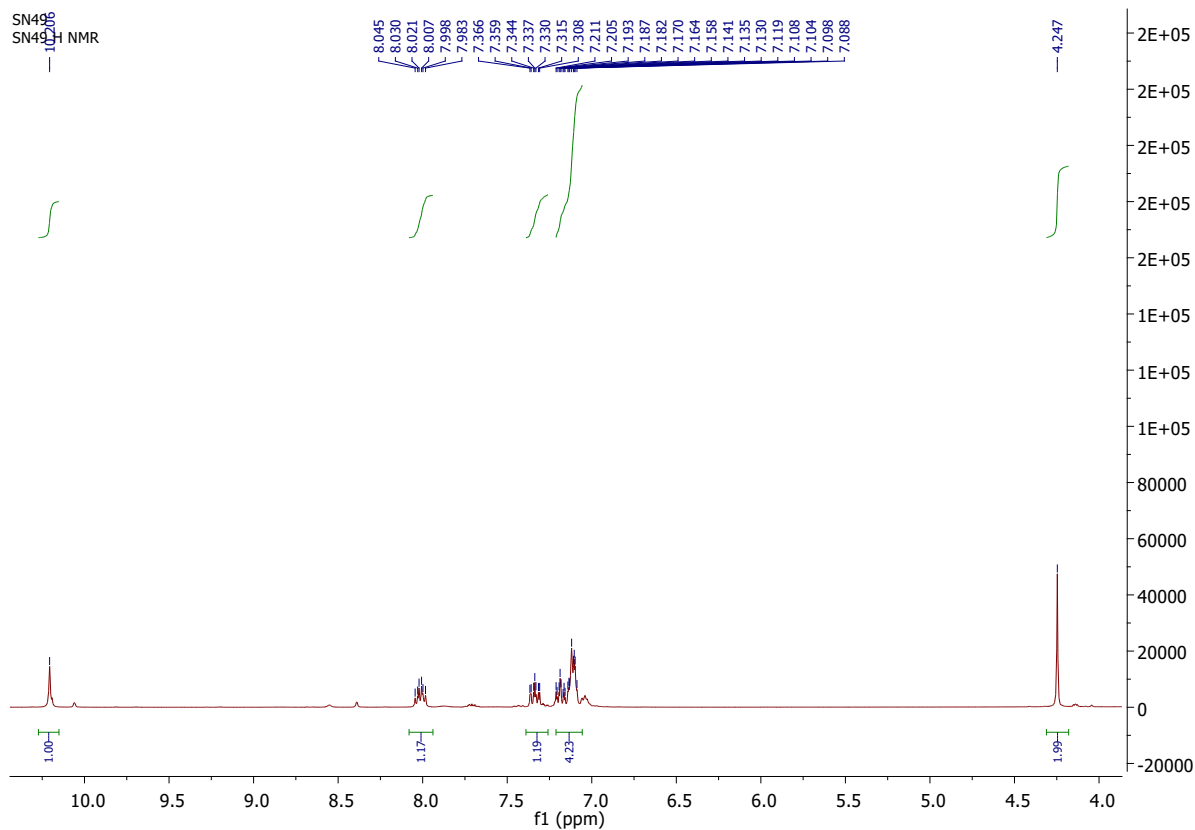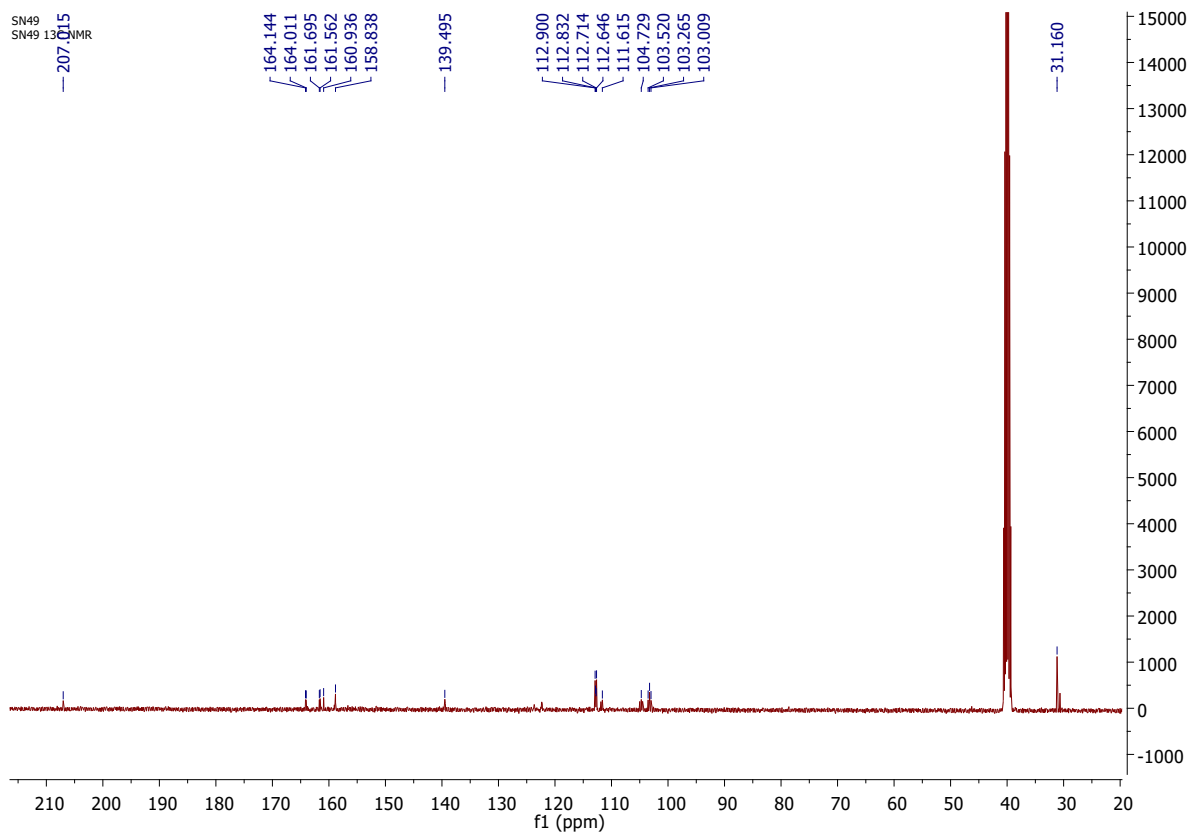

**$H^1$  &  $^{13}C$ NMR of Compound 4h**

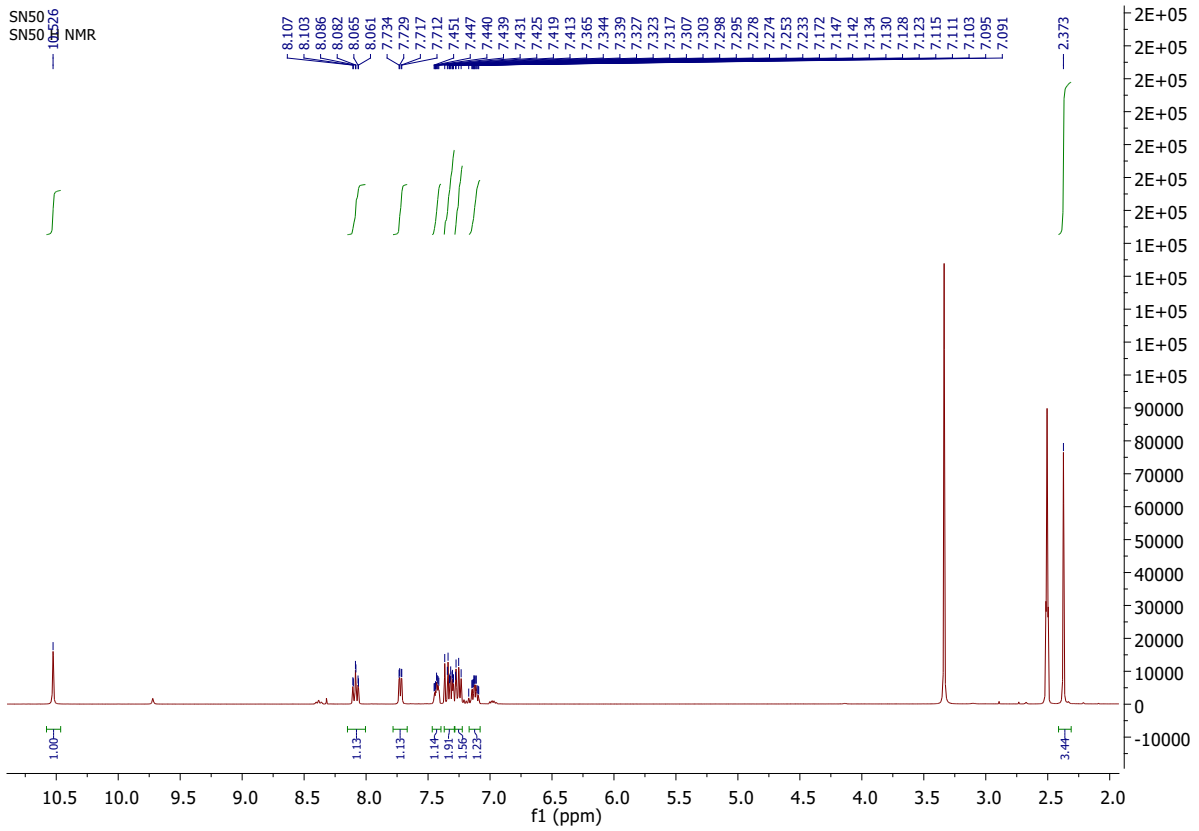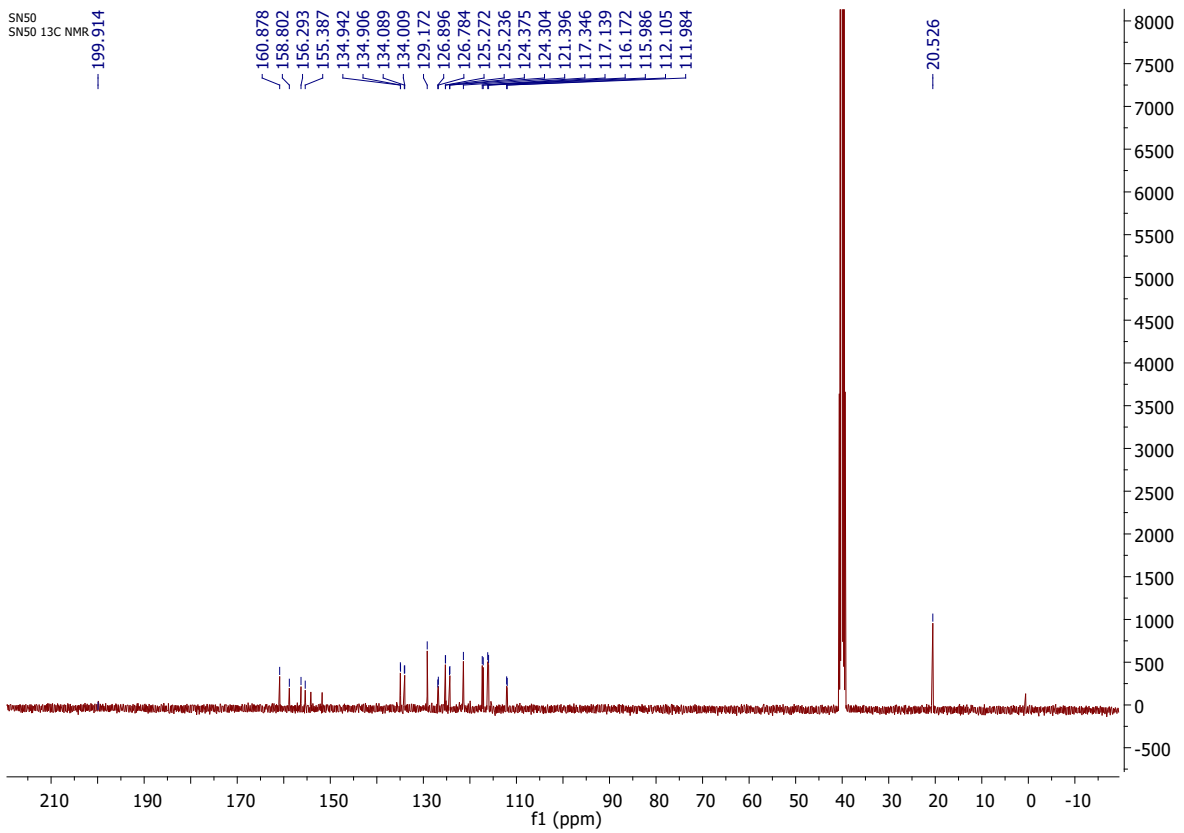

**$^1\text{H}$  &  $^{13}\text{C}$ NMR of Compound 4i**

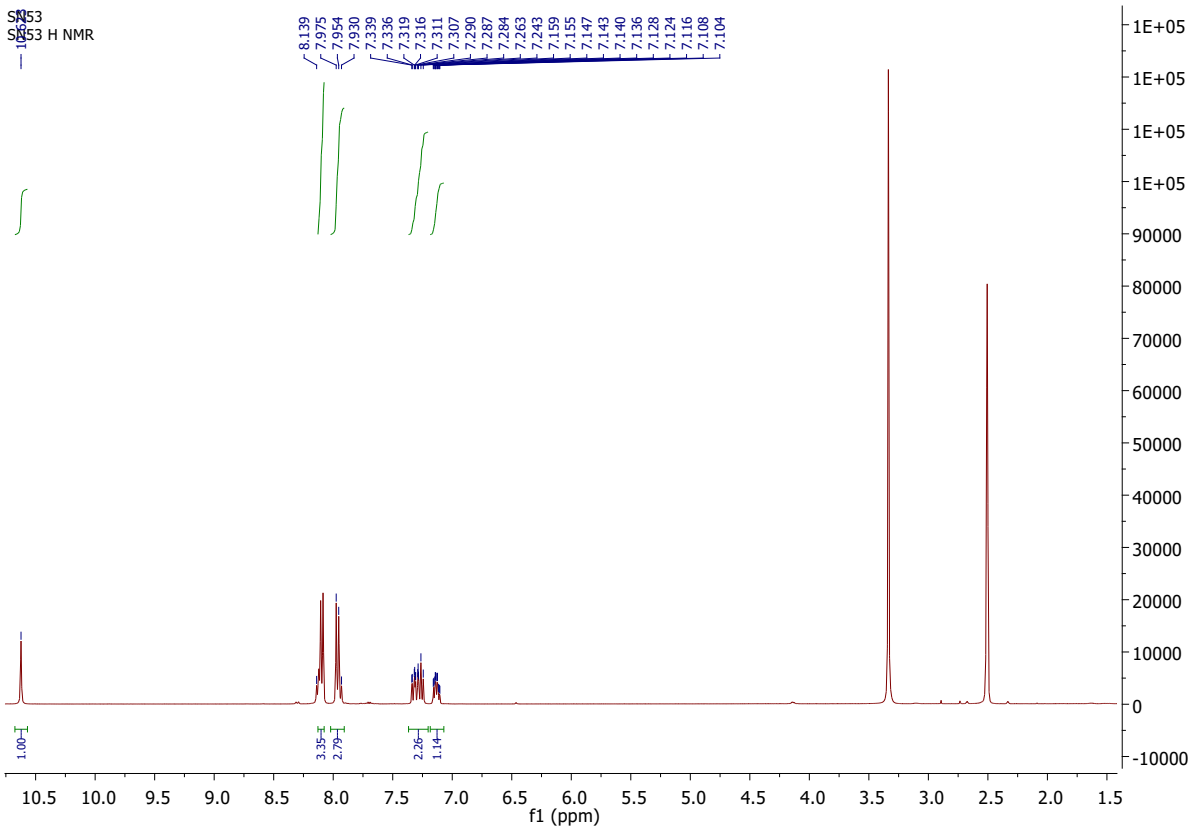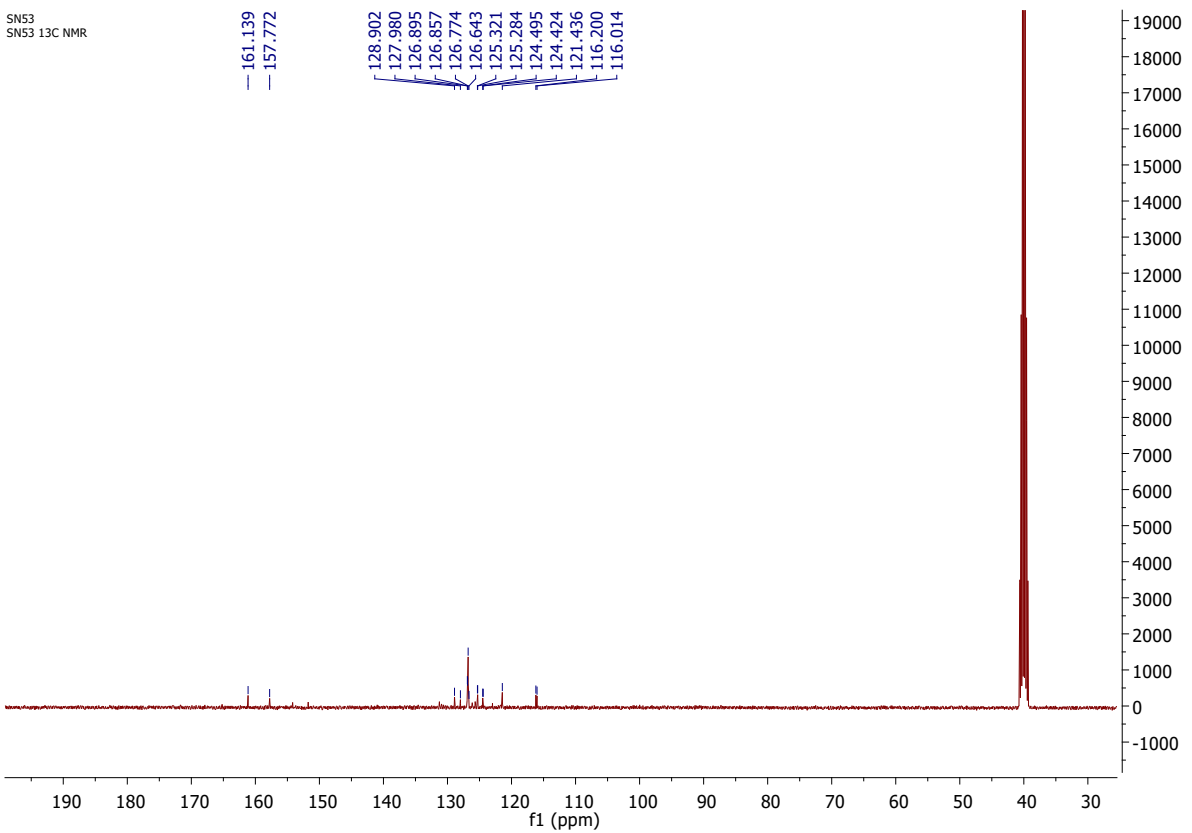

**$H^1$  &  $^{13}C$ NMR of Compound 4j**

SN57  
SN57 H NMR

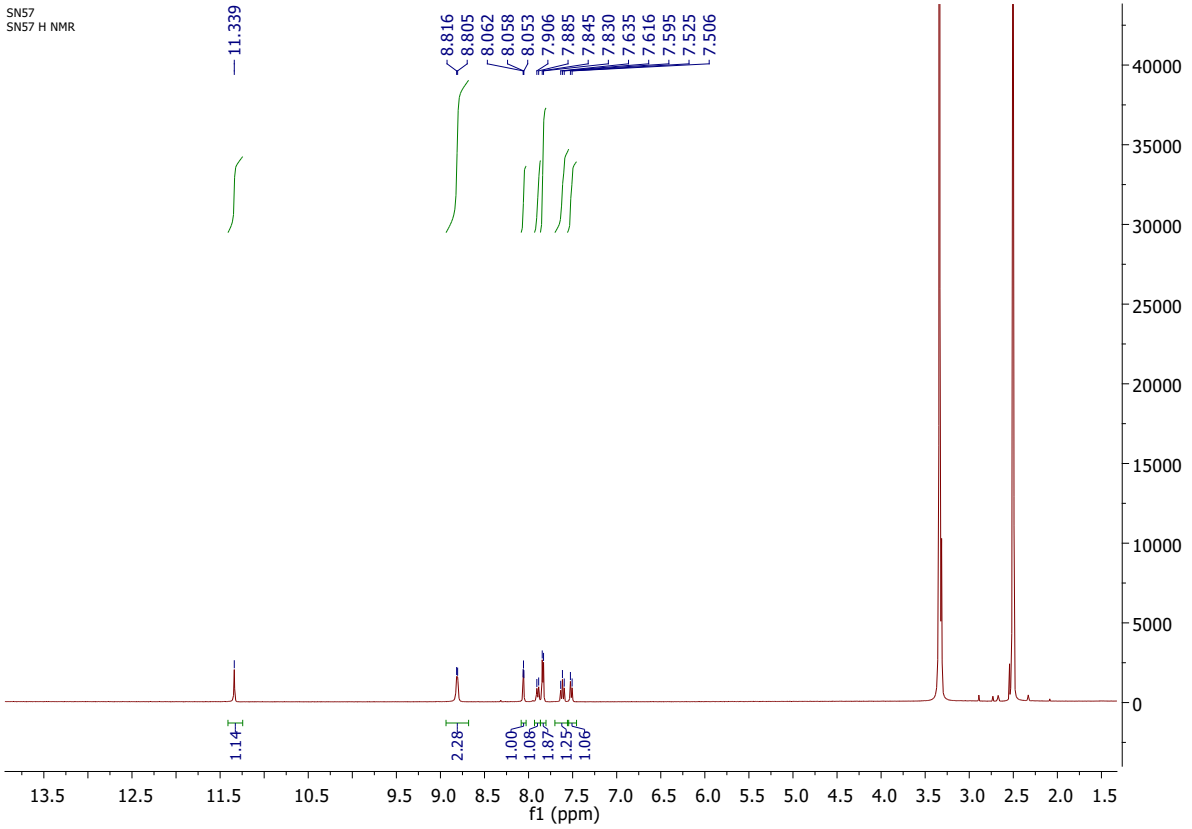

hf-RA-20180913-02C20

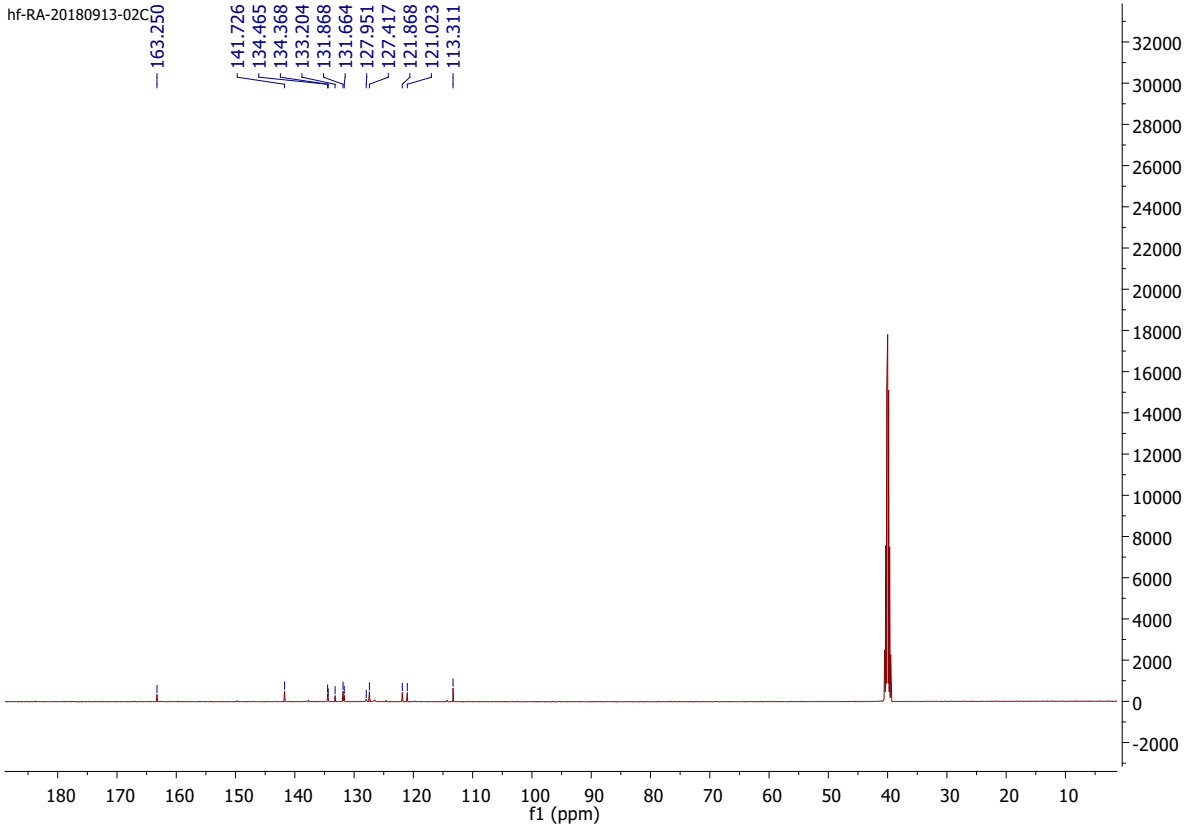

# $^1\text{H}$ & $^{13}\text{C}$ NMR of Compound 4k

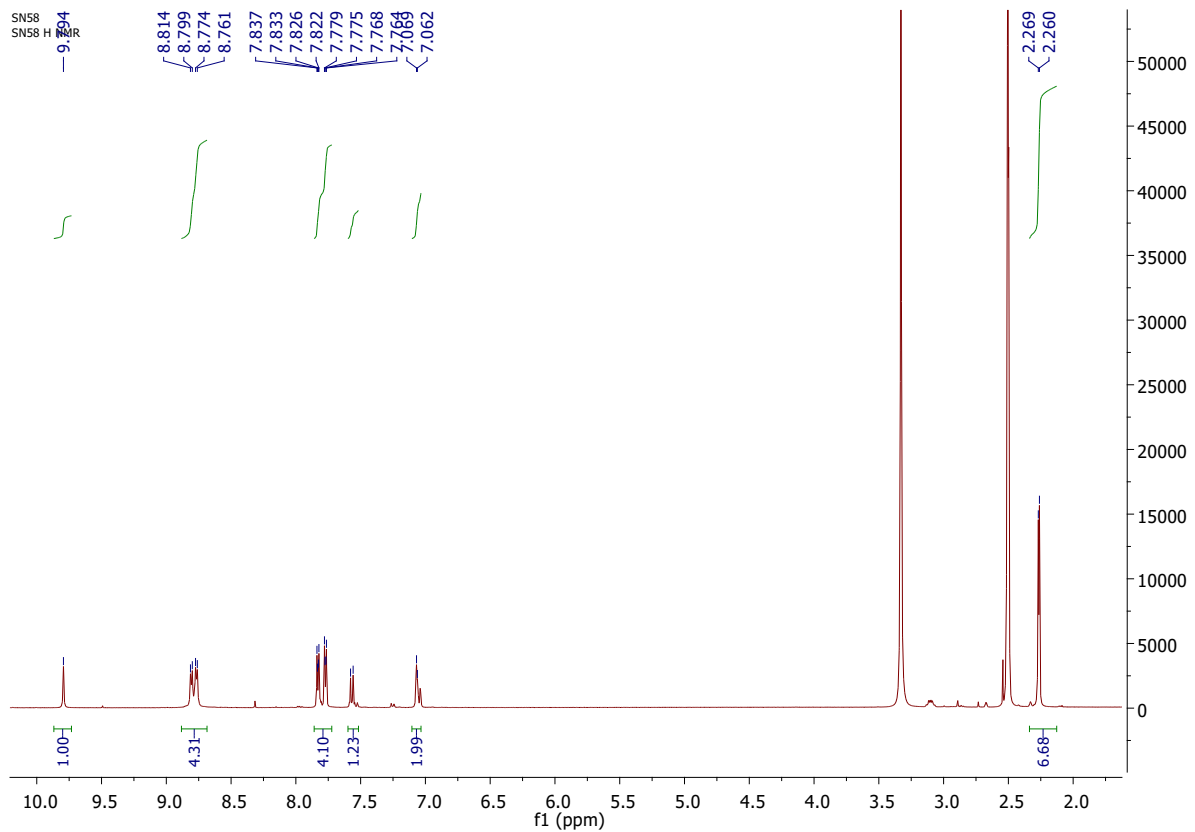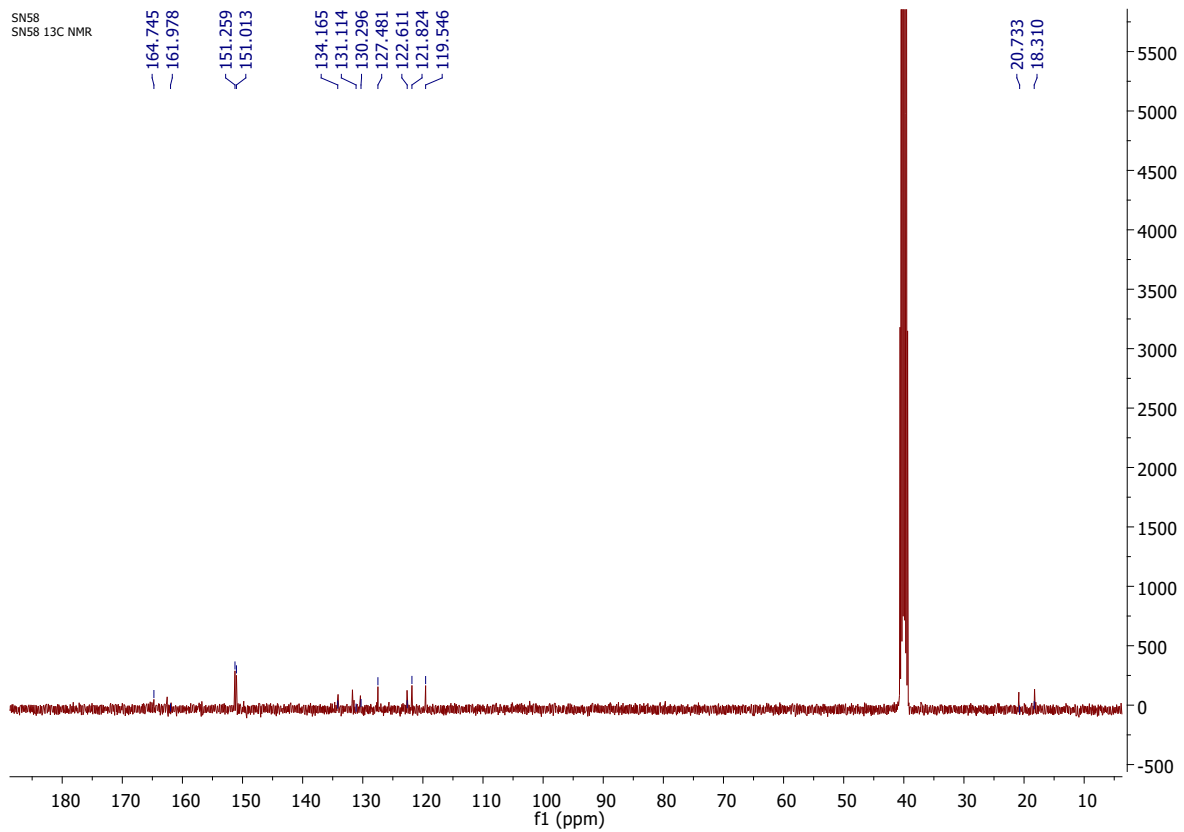

# $^1\text{H}$ & $^{13}\text{C}$ NMR of Compound 4l

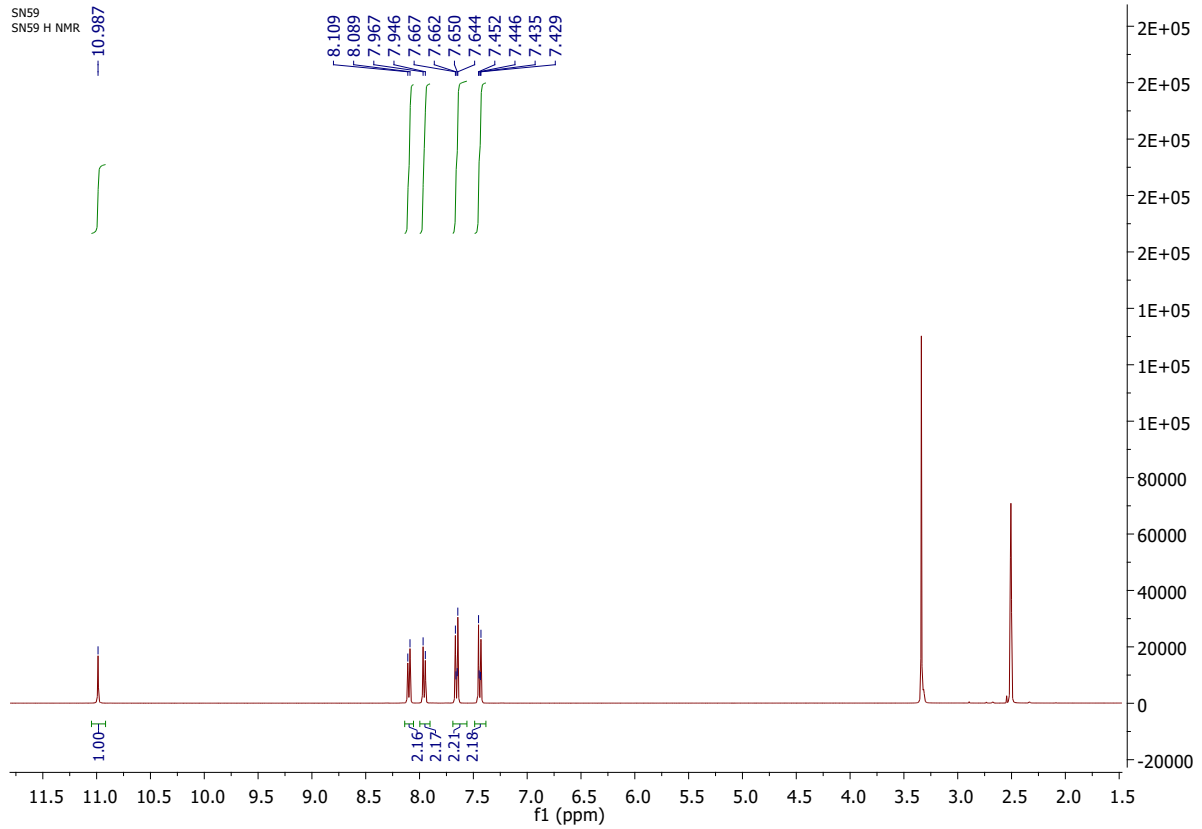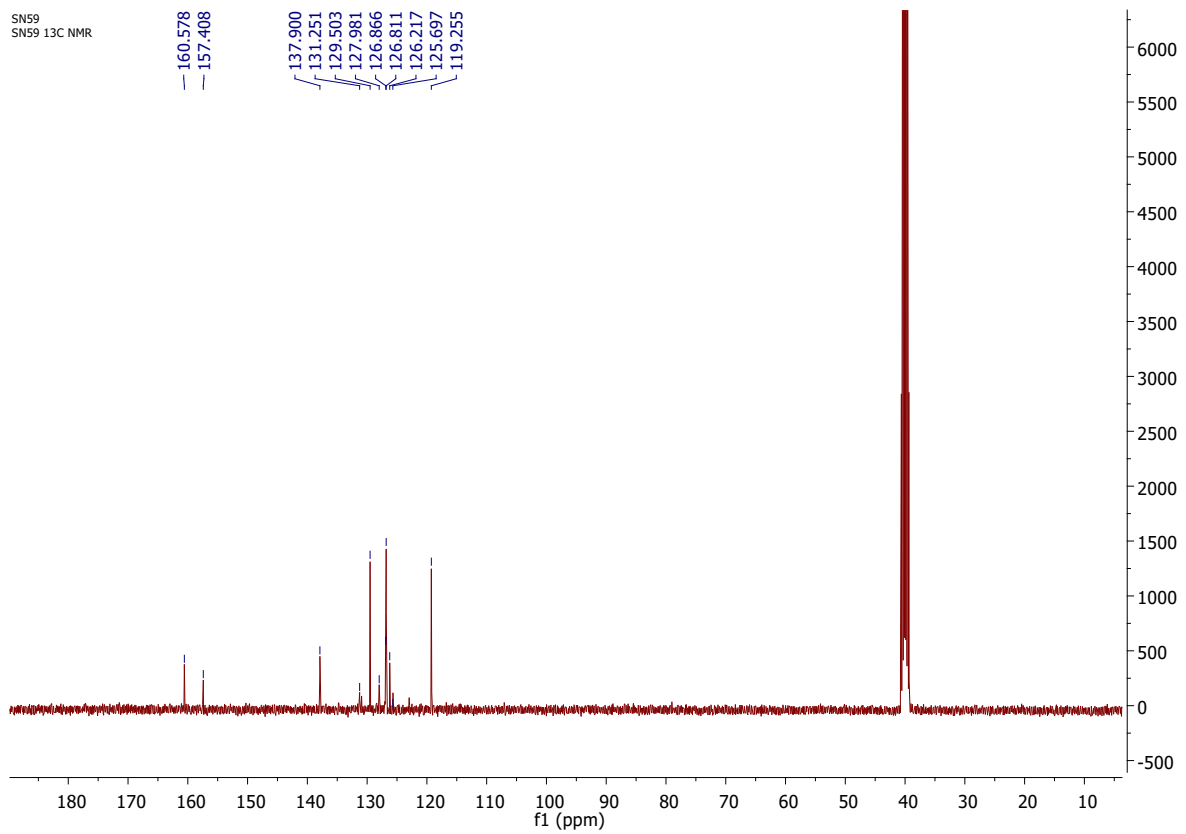

# H<sup>1</sup> & <sup>13</sup>CNMR of Compound 4m

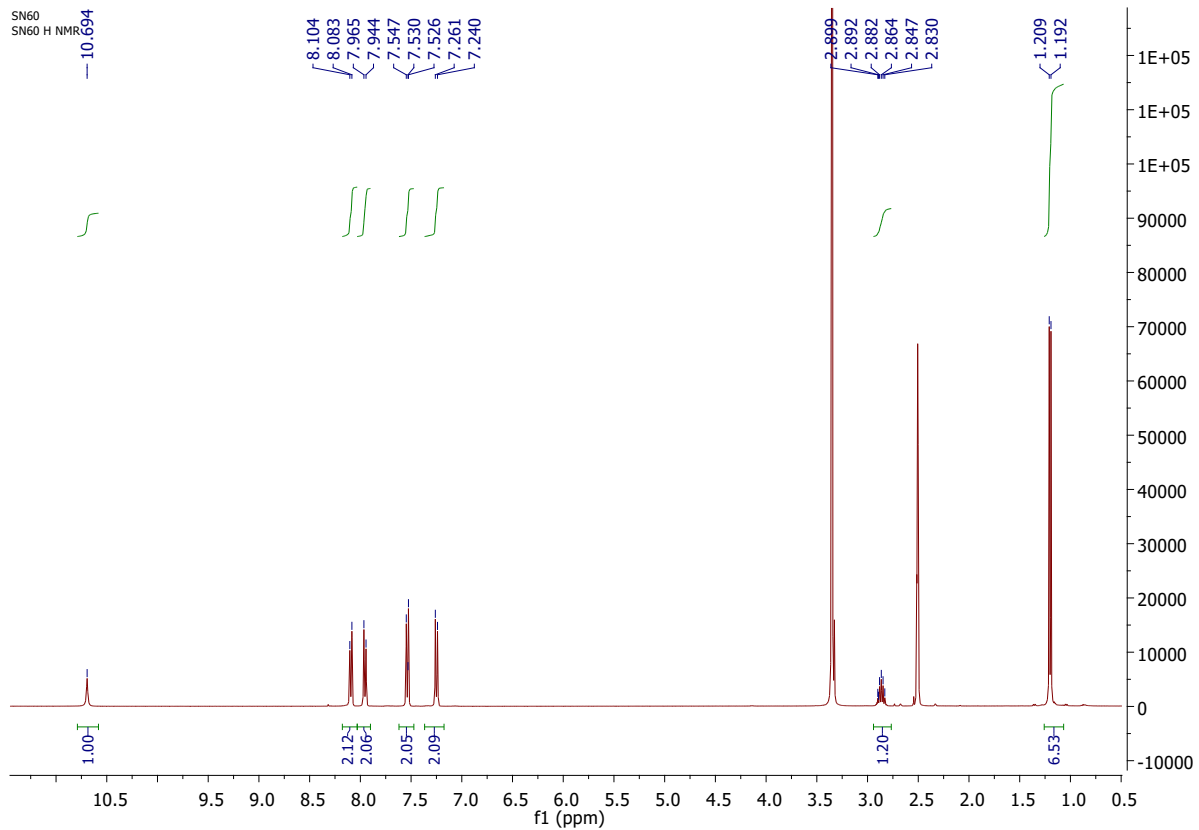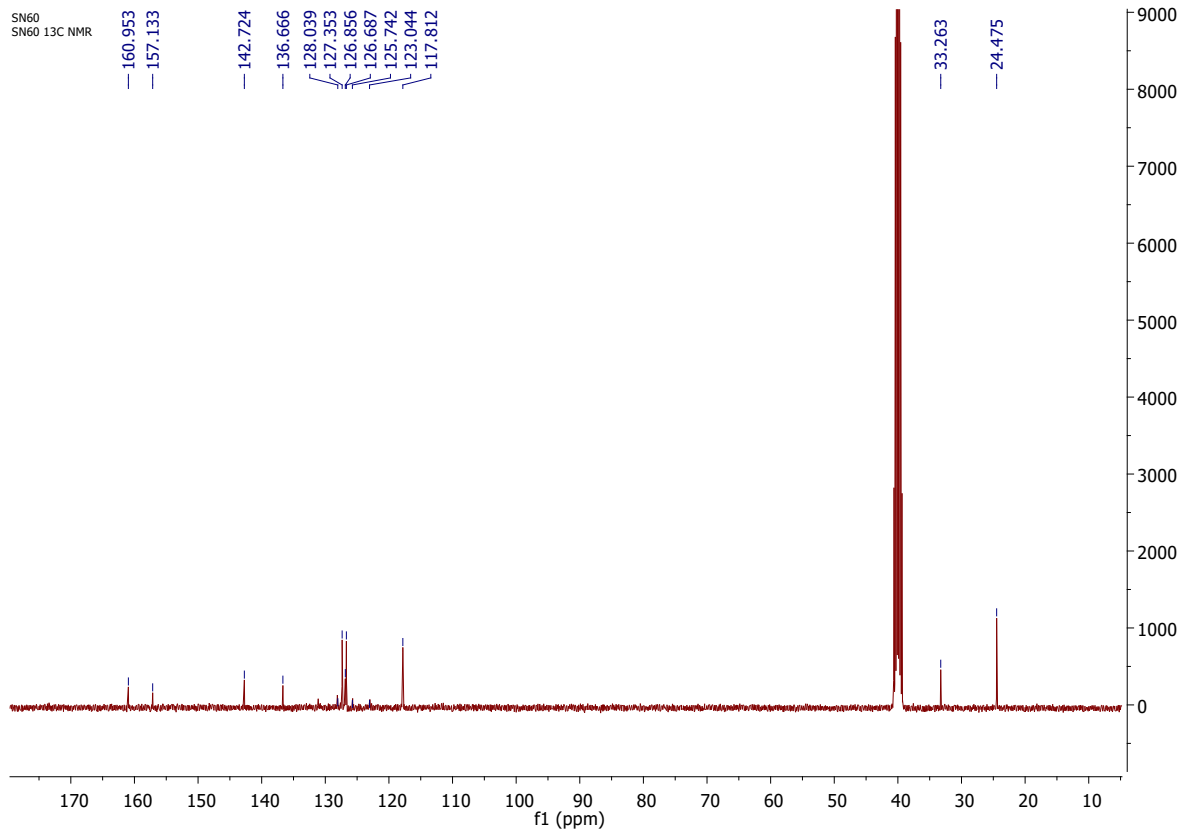



# H<sup>1</sup> & <sup>13</sup>CNMR of Compound 4n

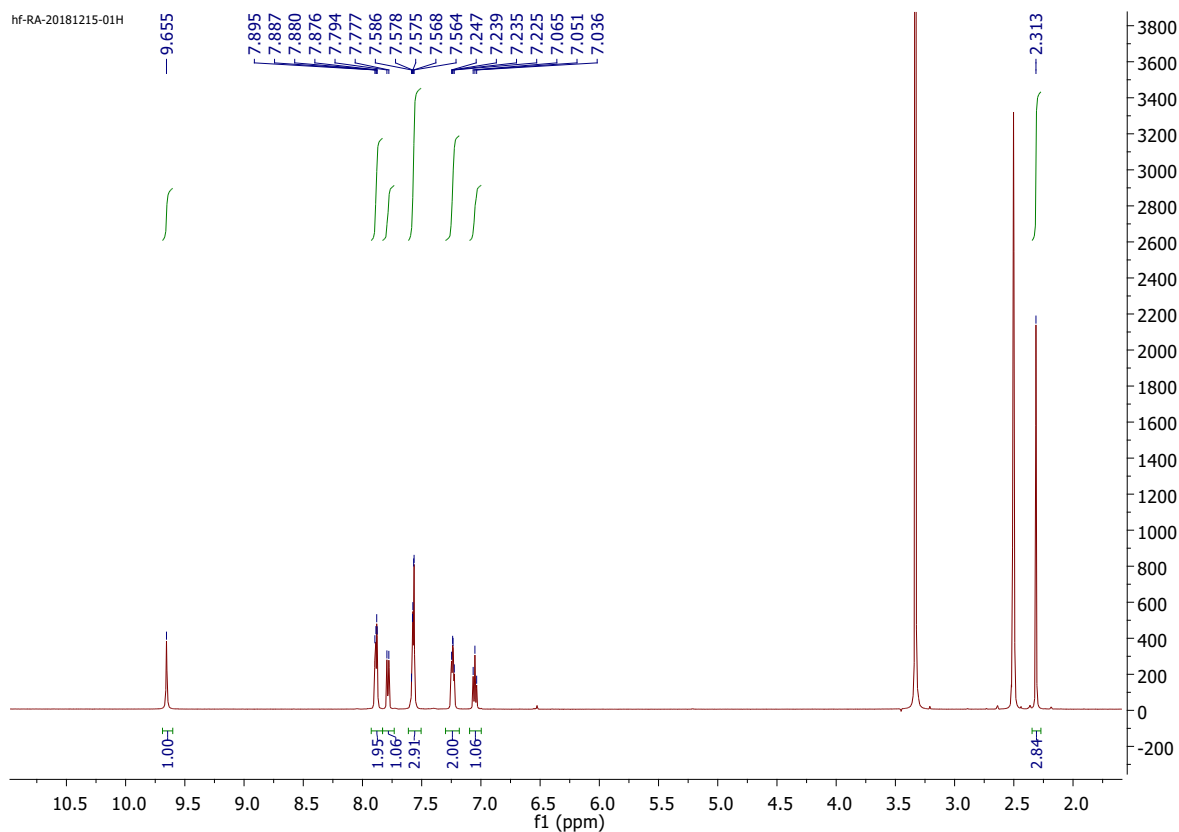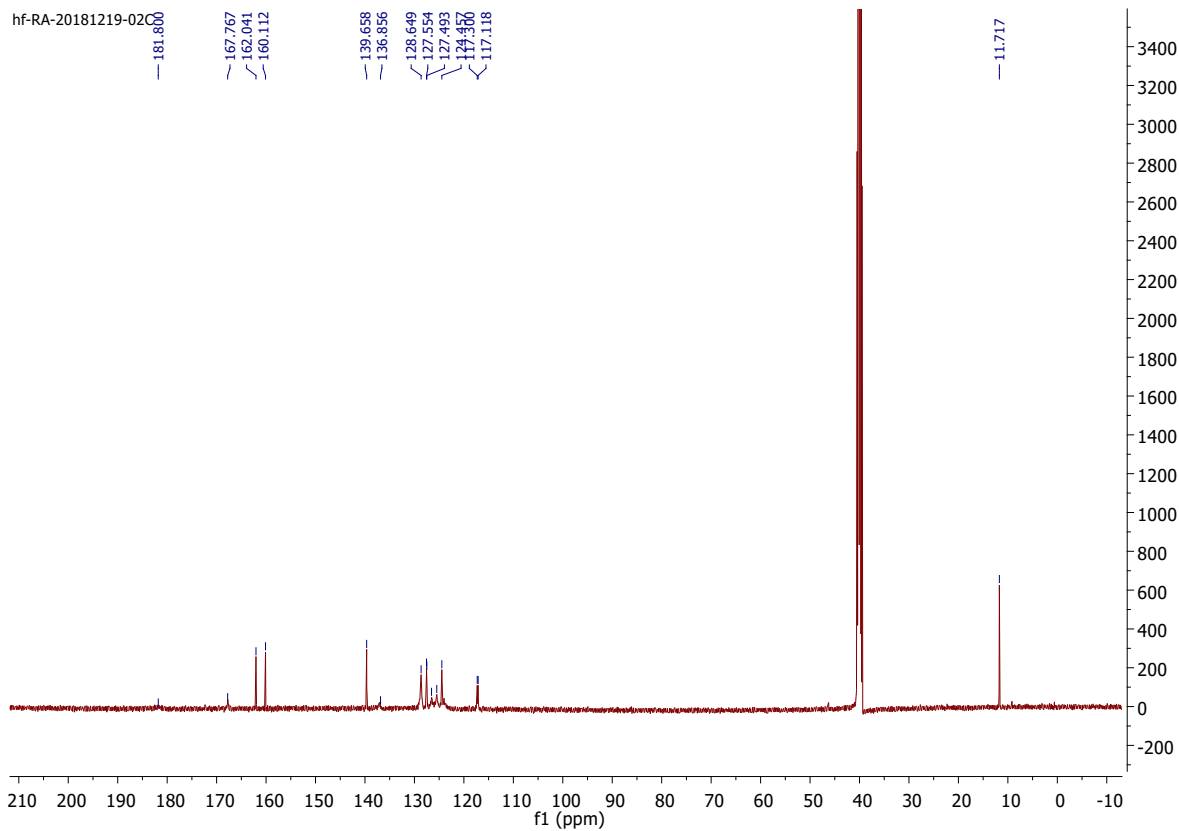

# $^1\text{H}$ & $^{13}\text{C}$ NMR of Compound 4o

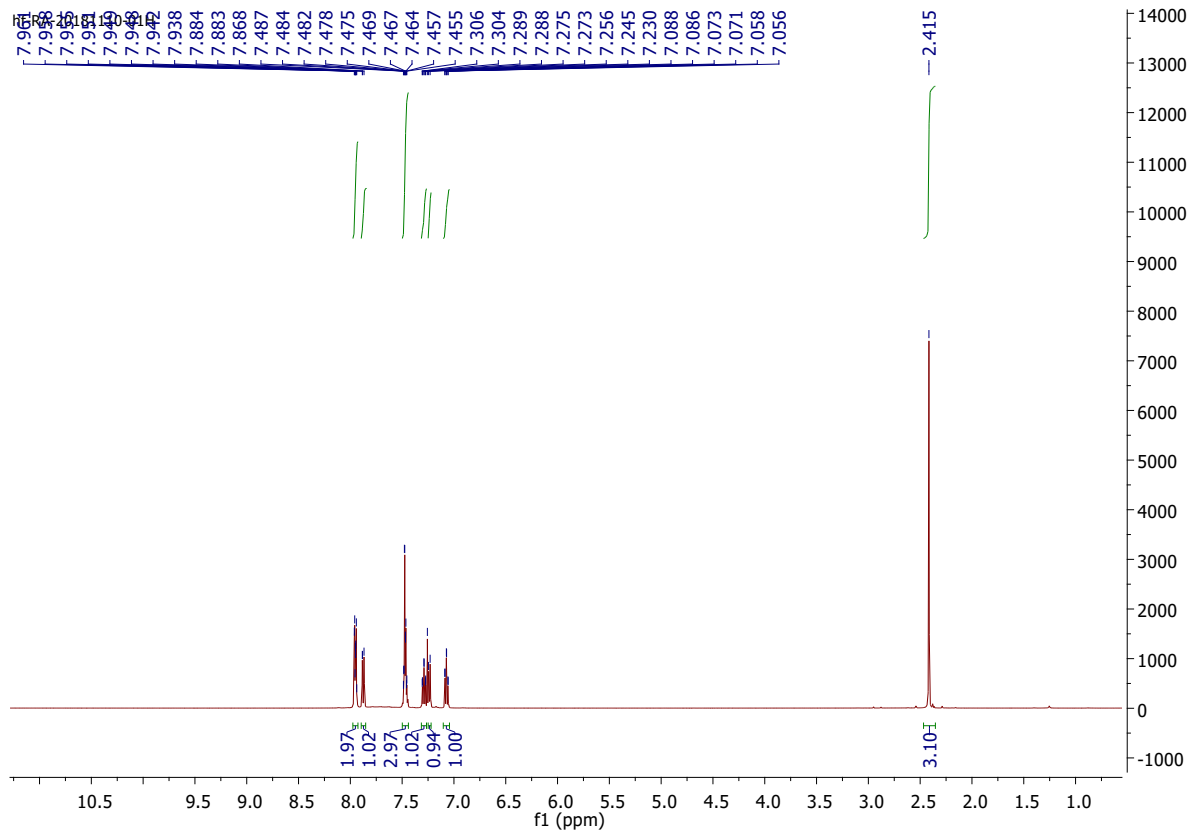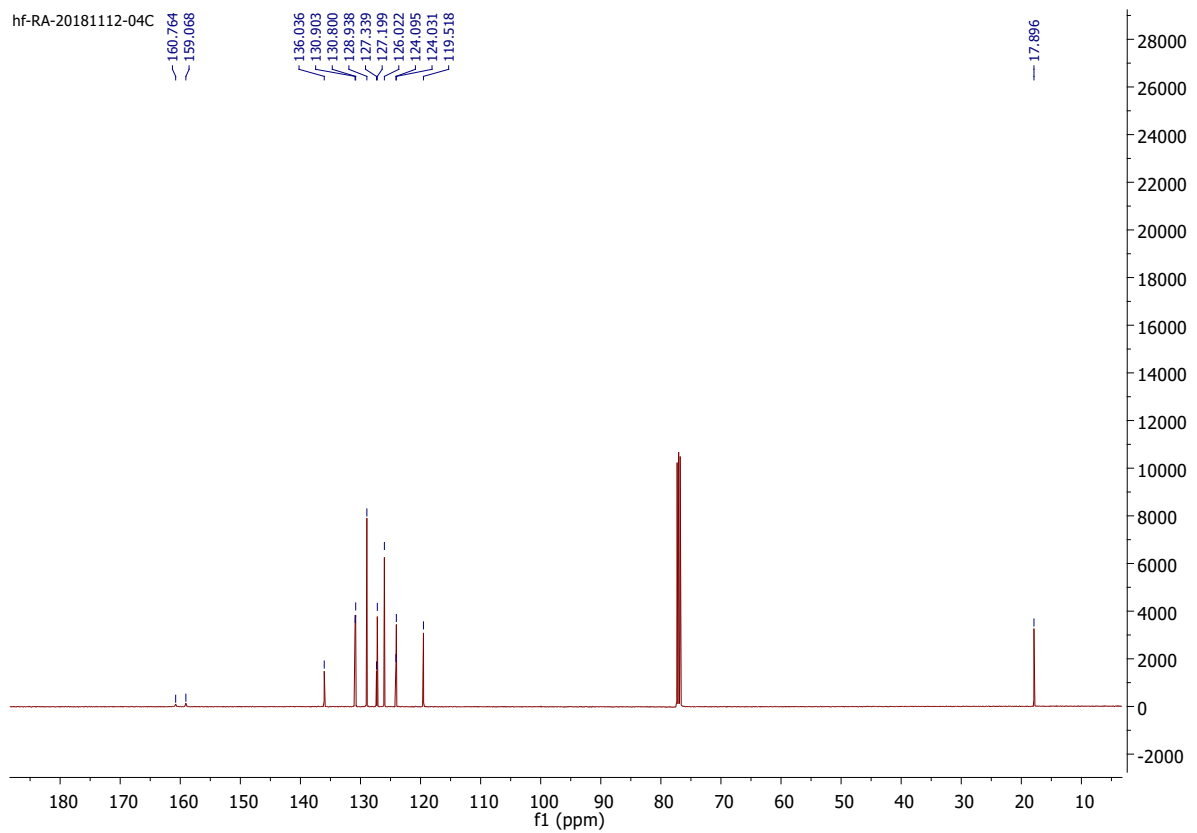

Supplement: d3ra01953e1.pdf [file d3ra01953e1.pdf]
